# Supplementary material for: Gait Declines Differentially in, and Improves Prediction of, People with Parkinson’s Disease Converting to a Freezing of Gait Phenotype
Source: PubMed Central journal article supplement — J Parkinsons Dis. 2023 Sep 8;13(6):961–73. doi: 10.3233/JPD-230020 (PMC10578275; doi:10.3233/jpd-230020), 2023-09-08
Supplement: jpd-13-jpd230020-s001.pdf [file jpd-13-jpd230020-s001.pdf]

# Supplementary Material

## Gait Declines Differentially in, and Improves Prediction of, People with Parkinson’s Disease Converting to a Freezing of Gait Phenotype

**Supplementary Table 1.** Summary of FOG criteria and study assessments used in published FOG prediction studies.

| Study                       | Initial noFOG | Final FOGConv | maximum duration monitored (y) | Monitoring Interval                            | best estimated conversion rate | FOG criteria used                | Levodopa state                  |
|-----------------------------|---------------|---------------|--------------------------------|------------------------------------------------|--------------------------------|----------------------------------|---------------------------------|
| Giladi 2001                 | 743           | 193           | 2                              | Every 3 months                                 | 13.0%                          | UPDRS 2.14                       | OFF                             |
| Forsaa 2015                 | 169           | 82            | 12                             | At 4 years, 8 years, then annually             | 12.4%                          | UPDRS 2.14                       |                                 |
| Zhang 2016                  | 248           | 128           | 3                              | Annually                                       | 17.2%                          | self-assessment or exam          | pre-levodopa->some on levodopa? |
| Veervoort 2016 <sup>+</sup> | 59            | 5             | 1                              | At 1 year                                      | 8.5%                           | N-FOG-Q                          | OFF                             |
| Ou 2017                     | 225           | 85            | 3                              | At 3 years                                     | 12.6%                          | FOG-Q 3                          | OFF                             |
| Ehgoetz-Martens 2018        | 129           | 41            | 2                              | variable, at least 2 visits 6-24 months apart  | 15.9%                          | FOG-Q item 3                     | not reported                    |
| D'Cruz 2020 <sup>+</sup>    | 60            | 12            | 2                              | annually                                       | 11.8%                          | N-FOG-Q                          | OFF                             |
| D'Cruz 2021 <sup>+</sup>    | 45            | 9             | 2                              | At 2 years                                     | 20.0%                          | N-FOG-Q                          | OFF                             |
| Gallea 2021                 | 25            | 17            | 5                              | At 5 years                                     | 13.6%                          | GABS                             | OFF/ON                          |
| Xu 2021                     | 967           | 255           | 1                              | At 1 year                                      | 26.4%                          | UPDRS 2.14, NFOGQ                | OFF                             |
| Jeong JPD 2021              | 329           | 52            | 2                              | Every 3-6 months                               | 7.9%                           | subjective+objective?            | pre-levodopa                    |
| Zhao 2022                   | 350           | 132           | 2                              | At 2 years                                     | 18.9%                          | N-FOG-Q, or self-report, or exam | not reported                    |
| <b>PPMI Database</b>        |               |               |                                |                                                |                                |                                  |                                 |
| Kim 2019                    | 393           | 136           | 3                              | Every 3 months first year, then every 6 months | 11.5%                          | MDS UPDRS, either 2.13 or 3.11   | pre-levodopa-> OFF/ON           |
| Kim 2018                    |               |               |                                |                                                |                                |                                  | pre-levodopa-> OFF/ON           |
| Banks 2019                  | 100           | 50            | 4                              | Every 3 months first year, then every 6 months | 12.5%                          | MDS UPDRS 2.13                   | pre-levodopa-> OFF/ON           |

|                              |     |    |   |                                                  |      |                                   |                          |
|------------------------------|-----|----|---|--------------------------------------------------|------|-----------------------------------|--------------------------|
| Wang 2022                    | 183 | 68 | 5 | Every 3months first year,<br>then every 6 months | 7.4% | ADLs or exam                      | pre-levodopa-><br>OFF/ON |
| <b>Retrospective studies</b> |     |    |   |                                                  |      |                                   |                          |
| Herman 2018                  | 57  | 26 | 5 | At 5 years                                       | 9.1% | N-FOG-Q + clinical<br>observation | OFF/ON                   |
| Jung 2020                    | 433 | 44 | 5 | Every 3-6 months,<br>retrospective chart review  | 2.0% | self report or exam               | not reported             |

| <b>Study cont.</b>             | <b>Gait</b>    | <b>balance</b>                        | <b>cognition</b>                                                                                                                  | <b>Psychiatric</b>                             | <b>Non-motor</b>                                                   | <b>Sleep</b>  | <b>olfaction</b>         | <b>imaging</b> | <b>other</b>                          |
|--------------------------------|----------------|---------------------------------------|-----------------------------------------------------------------------------------------------------------------------------------|------------------------------------------------|--------------------------------------------------------------------|---------------|--------------------------|----------------|---------------------------------------|
| Giladi 2001                    |                |                                       |                                                                                                                                   |                                                |                                                                    |               |                          |                |                                       |
| Forsaa 2015                    |                |                                       | MMSE                                                                                                                              | UPDRS 1.2                                      |                                                                    |               |                          |                |                                       |
| H Zhang 2016                   |                |                                       |                                                                                                                                   | HAMD,<br>HAMA                                  | NMSS                                                               |               |                          |                |                                       |
| Veervoort<br>2016 <sup>+</sup> | spatiotemporal | MiniBEST,<br>fall history             |                                                                                                                                   |                                                |                                                                    |               |                          |                |                                       |
| Ou 2017                        |                | falls history                         | MoCA, FAB                                                                                                                         | HAMD,<br>HAMA                                  | NMSS                                                               |               |                          |                |                                       |
| Ehgoets<br>Martens 2018        |                |                                       | Digit span,<br>MMSE, logical<br>memory, TMT<br>A, B                                                                               | HADSA/D                                        |                                                                    | RBDSQ4        |                          |                |                                       |
| D'Cruz 2020 <sup>+</sup>       | spatiotemporal | Falls efficacy<br>scale,<br>miniBEST, | MMSE, MoCA,<br>SCOPA-Cog,<br>FAB, Alternate<br>Naming Test,<br>Alternate intake<br>test, Rey-<br>Osterrieth, trial<br>making test | Hospital<br>Anxiety and<br>depression<br>scale |                                                                    |               |                          |                | objective<br>finger/foot<br>tapping   |
| D'Cruz 2021                    | spatiotemporal |                                       |                                                                                                                                   |                                                |                                                                    |               |                          | MRI            |                                       |
| Gallea 2021                    | GABS           | GABS                                  |                                                                                                                                   |                                                |                                                                    |               |                          |                | antisaccade<br>task, SWJ<br>frequency |
| Xu 2021                        |                |                                       | MMSE                                                                                                                              | HAMD                                           | NMSS,<br>ROME III<br>constipation<br>criteria, PD<br>Fatigue scale | RBD-Q,<br>ESS | Hyposmia<br>rating scale |                | PDQ-39                                |

|                              |                        |                                    |                                                                                                                                                |                                                         |                      |            |       |             |                                                                        |
|------------------------------|------------------------|------------------------------------|------------------------------------------------------------------------------------------------------------------------------------------------|---------------------------------------------------------|----------------------|------------|-------|-------------|------------------------------------------------------------------------|
| Jeong JPD 2021               |                        |                                    | K-MMSA                                                                                                                                         | K-NPI                                                   |                      |            |       | DAT, FP-PET |                                                                        |
| Zhao 2022                    |                        | Berg-balance                       | MoCA                                                                                                                                           | HAMD, HAMA                                              |                      |            |       |             |                                                                        |
| <b>PPMI Database</b>         |                        |                                    |                                                                                                                                                |                                                         |                      |            |       |             |                                                                        |
| Kim 2019                     |                        |                                    | MoCA                                                                                                                                           | GDS, state trait anxiety inventory                      | SCOPA-Aut            | RBD-Q, ESS | UPSIT | DAT         | CSF A $\beta$ 42                                                       |
| Kim 2018                     | Same as Kim 2019 above |                                    |                                                                                                                                                |                                                         |                      |            |       |             |                                                                        |
| Banks 2019                   |                        |                                    | MoCA, phonemic fluency, semantic fluency, letter no. seq, Judge line orient., symbol digit mod, Hopkins verbal learn test, total learning task | GDS, state trait anxiety inventory                      | MDS-UPDRS part 2     | RBD-Q, ESS |       |             |                                                                        |
| Wang 2022                    |                        |                                    | MoCA, phonemic fluency, semantic fluency, letter no. seq, Judge line orient., symbol digit mod, hopkin verbal learn test, total learning task  | GDS, state trait anxiety inventory, Q for imp do (QUIP) | SCOPA-Aut            | RBD-Q, ESS | UPSIT | DAT, FP-PET | CSF A $\beta$ 42, total tau, $\alpha$ -syn; Genetics MAPT, APOE4, SNCA |
| <b>Retrospective studies</b> |                        |                                    |                                                                                                                                                |                                                         |                      |            |       |             |                                                                        |
| Herman 2018                  | spatiotemporal         | fall risk, Berg balance scale, ABC | MMSE, MoCA, TMT A and B                                                                                                                        | GDS, UPDRS 1 subscore                                   | NMS scale, SCOPA-Aut | PSQi       |       |             | PDQ-39                                                                 |
| Jung 2020                    |                        |                                    | Korean-MMSE                                                                                                                                    | BDI                                                     |                      |            | CCSIT | MRI, FP-PET |                                                                        |

**Supplementary Table 2.** Univariate predictive analysis

| <b>Feature</b>                                    | <b>No. of studies</b> | <b>Study</b>                                              |
|---------------------------------------------------|-----------------------|-----------------------------------------------------------|
| LEDD*                                             | 4                     | Forsaa 2015, Zhang 2016, Ou 2017, Ehgoetz-Martens 2018    |
| lower TD/non-TD or greater non-TD                 | 4                     | Ehgoetz-Martens 2018, Xu 2021, PPMI (Kim 2018, Wang 2022) |
| NMSS scales (total, item), SCOPA-Aut              | 4                     | Zhang 2016, Ou 2017, Xu 2021, Wang 2022                   |
| Depression (HAM-D, HADs D)                        | 4                     | Zhang 2016, Ou 2017, Ehgoetz-Martens 2018, Xu 2021        |
| Age*                                              | 3                     | Zhang 2016, Xu 2021, Wang 2022                            |
| lower cognition scores                            | 3                     | Xu 2021, PPMI (Kim 2018, Wang 2022)                       |
| Anxiety (HAM-A, HADs A)                           | 3                     | Zhang 2016, Ou 2017, Ehgoetz-Martens 2018                 |
| MDS III total                                     | 2                     | Ou 2017, Kim 2018                                         |
| MDS III subscores                                 | 2                     | Giladi 2001, Xu 2021                                      |
| Hoehn & Yahr scale                                | 2                     | Ou 2017, Xu 2021                                          |
| Male sex                                          | 2                     | Xu 2021, Kim 2018                                         |
| lower education level                             | 2                     | Zhang 2016, Xu 2021                                       |
| Disease duration                                  | 2                     | Giladi 2001, Xu 2021                                      |
| early amantadine use                              | 2                     | Zhang 2016, Xu 2021                                       |
| DAT (lower caudate and putamen uptake)            | 2                     | PPMI (Kim 2018, Wang 2022)                                |
| MRI (thalamic inflation, cerebellar connectivity) | 2                     | D'cruz 2021, Jung 2020)                                   |
| lower A $\beta$ 42                                | 2                     | PPMI (Kim 2018, Wang 2022)                                |
| Single task gait asymmetry                        | 1                     | D'cruz 2020                                               |
| dual task gait asymmetry                          | 1                     | D'cruz 2020                                               |
| swing time CV                                     | 1                     | D'cruz 2020                                               |
| finger tap ampl CV                                | 1                     | D'cruz 2020                                               |
| finger tap phase inconsistency                    | 1                     | D'cruz 2020                                               |
| finger tap amplitude                              | 1                     | D'cruz 2020                                               |
| toe tap phase inconsistency                       | 1                     | D'cruz 2020                                               |
| MDS non-motor subscale cognition                  | 1                     | D'cruz 2020                                               |
| MDS non-motor subscale pain                       | 1                     | D'cruz 2020                                               |
| MDS II                                            | 1                     | Wang 2022                                                 |
| MDS I                                             | 1                     | Wang 2022                                                 |
| miniBEST                                          | 1                     | Veervort 2016                                             |
| rural residence location                          | 1                     | Zhang 2016                                                |
| motor fluctuations                                | 1                     | Forsaa 2015                                               |
| dyskinesias                                       | 1                     | Forsaa 2015                                               |
| FOG-Q*                                            | 1                     | Ehgoetz-Martens 2018                                      |
| falls                                             | 1                     | Ou 2017                                                   |
| increased anti-saccade latency                    | 1                     | Gallea 2021                                               |
| PDQ-39                                            | 1                     | Xu 2021                                                   |
| *Significant in our study                         |                       |                                                           |

**Supplementary Table 3.** Multivariable analysis features reported to be predictive of FOG conversion

| Feature                                                                                       | No. of studies | Study                                                                   |
|-----------------------------------------------------------------------------------------------|----------------|-------------------------------------------------------------------------|
| disease duration                                                                              | 4              | Ou 2017, Ehgoetz-Martens 2018, Gallea 2021, Zhao 2022                   |
| depression scores                                                                             | 4              | Ehgoetz-Martens 2018, D'Cruz 2020, Zhao 2022, Herman 2018               |
| lower TD/non-TD or greater non-TD                                                             | 3              | Ehgoetz-Martens 2018, Xu 2021, PPMI (Kim 2018 PRD, Kim 2018, Wang 2022) |
| age                                                                                           | 2              | Ehgoetz-Martens 2018, Xu 2021                                           |
| LEDD                                                                                          | 2              | D'cruz 2021, Zhao 2022                                                  |
| gait speed                                                                                    | 2              | D'cruz 2020, Herman 2018                                                |
| DAT (lower caudate, caudate and putamen)                                                      | 1              | PPMI (Kim 2018, Kim 2018 PRD)                                           |
| A $\beta$ 42                                                                                  | 1              | PPMI (Kim 2018, Wang 2022)                                              |
| SDMT                                                                                          | 1              | PPMI (Banks 2019, Wang 2022)                                            |
| MDS UPDRS II and III axial                                                                    | 1              | D'cruz 2020                                                             |
| MDS UPDRS II hand function                                                                    | 1              | D'cruz 2020                                                             |
| MDS UPDRS I                                                                                   | 1              | D'cruz 2020                                                             |
| MDS UPDRS I fatigue score                                                                     | 1              | Wang 2022                                                               |
| UPDRS III ON vs OFF scores                                                                    | 1              | Herman 2018                                                             |
| MDS UPDRS III                                                                                 | 1              | Ou 2017                                                                 |
| MDS UPDRS III Item 30                                                                         | 1              | Xu 2021                                                                 |
| delta UPDRS III                                                                               | 1              | Ou 2017                                                                 |
| delta MoCA visuospatial-executive function                                                    | 1              | Ou 2017                                                                 |
| gender                                                                                        | 1              | D'cruz 2021                                                             |
| festination                                                                                   | 1              | Ou 2017                                                                 |
| falls                                                                                         | 1              | Ou 2017                                                                 |
| hallucinations                                                                                | 1              | Ou 2017                                                                 |
| FOG-Q                                                                                         | 1              | Ehgoetz-Martens 2018                                                    |
| fatigue on PFS score                                                                          | 1              | Xu 2021                                                                 |
| NMSS                                                                                          | 1              | Xu 2021                                                                 |
| PDQ-39                                                                                        | 1              | Xu 2021                                                                 |
| lower limb motor onset                                                                        | 1              | Ou 2017                                                                 |
| finger tap amplitude, rhythm inconsistency relative phase inconsistency, frequency, amplitude | 1              | D'cruz 2020                                                             |
| gait variability                                                                              | 1              | D'cruz 2020                                                             |
| Dual-task gait asymmetry                                                                      | 1              | D'cruz 2020                                                             |
| Dual-task step width                                                                          | 1              | D'cruz 2020                                                             |
| toe tap amplitude                                                                             | 1              | D'cruz 2020                                                             |
| Stroop response time while walking                                                            | 1              | D'cruz 2020                                                             |

|                                |   |                      |
|--------------------------------|---|----------------------|
| motor upper limb + axial       | 1 | D'cruz 2020          |
| anxiety                        | 1 | Ehgoetz-Martens 2018 |
| HVLT-L                         | 1 | Banks 2019           |
| ESS                            | 1 | Banks 2019           |
| NPI total score                | 1 | Jeong 2021           |
| increased anti-saccade latency | 1 | Gallea 2021          |
| left thalamic inflation        | 1 | D'cruz 2021          |

**Supplementary Table 4.** Spatiotemporal gait parameter definitions.

| Measure                                          | Definition                                                                                                                                                                                                                                                                                |
|--------------------------------------------------|-------------------------------------------------------------------------------------------------------------------------------------------------------------------------------------------------------------------------------------------------------------------------------------------|
| Integrated-pressure (pressure x s)               | the sum of pressure applied by a footstep at each sampling time (120 Hz sampling rate) in the area of its contact with the ground.                                                                                                                                                        |
| Foot-strike-length (cm)                          | length of the major axis of the ellipse enclosing each footstep; PKMAS creates an ellipse around each footstep during footstep identification.                                                                                                                                            |
| Stride-length (cm)                               | the distance between heel strikes of two consecutive footsteps of the same foot, i.e., two right or two left heel strikes.                                                                                                                                                                |
| Stride-width (cm)                                | the distance between heel strikes of two consecutive footsteps of the same foot, i.e., two right or two left heel strikes, perpendicular to the direction of travel (y-axis)                                                                                                              |
| Stride-time (s)<br>also known as gait cycle time | the time difference (s) between the initial heel contacts with the mat of two consecutive footsteps of the same foot, i.e., two right or two left.                                                                                                                                        |
| Stride-velocity (cm/s)                           | the stride length divided by stride time, calculated for each gait cycle.                                                                                                                                                                                                                 |
| Swing-percent                                    | a percentage measure of time spent in swing phase of the gait cycle and calculated as stance time/gait cycle time.                                                                                                                                                                        |
| Total-double-support-percent                     | a percentage measure of the total time spent in total-double-support phase of the gait cycle and calculated as total double support time/gait cycle time.                                                                                                                                 |
| Stance-COP-distance (cm)                         | stance Center of Pressure distance; the Pythagorean distance between the first and last contact points of the center of pressure (COP) waveform trail for a footstep in stance phase, based on X and Y coordinates corresponding to first and last contact times of a foot during stance. |

<sup>1</sup>All calculations were auto-generated by the PKMAS software and definitions are based on the PKMAS Measurements and Definitions manual provided by Protokinetics with their software.

**Supplementary Table 5.** Area under the curve (AUC) values for classification of noFOG and FOGConv groups based on initial visit pre-conversion.

|                                             |      | AUC          | <i>p</i>     | Confidence Interval |              |
|---------------------------------------------|------|--------------|--------------|---------------------|--------------|
|                                             |      |              |              | Upper               | Lower        |
| <b>Age at onset (y)</b>                     |      | <b>0.735</b> | <b>0.039</b> | <b>0.544</b>        | <b>0.926</b> |
| Age at enrollment (y)                       |      | 0.500        | 1.000        | 0.266               | 0.734        |
| Disease duration (y)                        |      | 0.685        | 0.104        | 0.485               | 0.885        |
| <u>General motor function</u>               |      |              |              |                     |              |
| ON Motor UPDRS                              |      | 0.608        | 0.344        | 0.388               | 0.827        |
| ON Total UPDRS                              |      | 0.693        | 0.090        | 0.503               | 0.882        |
| Hoehn & Yahr stage                          |      | 0.635        | 0.235        | 0.430               | 0.840        |
| <b>FOG-Q</b>                                |      | <b>0.788</b> | <b>0.011</b> | <b>0.606</b>        | <b>0.969</b> |
| <u>Non-motor disease features</u>           |      |              |              |                     |              |
| MoCA                                        |      | 0.585        | 0.455        | 0.349               | 0.821        |
| SCOPA-Cog                                   |      | 0.533        | 0.775        | 0.306               | 0.759        |
| FAB                                         |      | 0.505        | 0.965        | 0.272               | 0.738        |
| HAM-D                                       |      | 0.663        | 0.153        | 0.448               | 0.877        |
| HAM-A                                       |      | 0.663        | 0.153        | 0.452               | 0.873        |
| AES                                         |      | 0.623        | 0.281        | 0.405               | 0.840        |
| ESS                                         |      | 0.325        | 0.124        | 0.129               | 0.521        |
| RBD-Q                                       |      | 0.525        | 0.826        | 0.299               | 0.751        |
| PDQ-39                                      |      | 0.638        | 0.226        | 0.414               | 0.861        |
| <u>Parkinson's Medications</u>              |      |              |              |                     |              |
| <b>Daily levodopa dose (mg)</b>             |      | <b>0.753</b> | <b>0.026</b> | <b>0.555</b>        | <b>0.950</b> |
| <b>Duration on levodopa (y)</b>             |      | <b>0.775</b> | <b>0.016</b> | <b>0.579</b>        | <b>0.971</b> |
| <b>LEDD (mg)</b>                            |      | <b>0.815</b> | <b>0.006</b> | <b>0.653</b>        | <b>0.977</b> |
| <u>Initial Spatiotemporal Gait Measures</u> |      |              |              |                     |              |
| Integrated pressure                         | mean | 0.640        | 0.218        | 0.430               | 0.850        |
|                                             | CV   | 0.595        | 0.403        | 0.388               | 0.802        |
| Foot-strike length (cm)                     | mean | 0.640        | 0.218        | 0.429               | 0.851        |
|                                             | CV   | 0.630        | 0.253        | 0.409               | 0.851        |
| Stride length (cm)                          | mean | 0.650        | 0.187        | 0.440               | 0.860        |
|                                             | CV   | 0.575        | 0.509        | 0.346               | 0.804        |
| <b>Stride width (cm)</b>                    | mean | 0.690        | 0.095        | 0.480               | 0.900        |
|                                             | CV   | <b>0.755</b> | <b>0.025</b> | <b>0.550</b>        | <b>0.960</b> |
| Stride time (s)                             | mean | 0.558        | 0.613        | 0.329               | 0.786        |
|                                             | CV   | 0.710        | 0.065        | 0.511               | 0.909        |
| Stride velocity (cm/s)                      | mean | 0.645        | 0.202        | 0.448               | 0.842        |
|                                             | CV   | 0.650        | 0.187        | 0.444               | 0.856        |
| Swing-phase percent                         | mean | 0.610        | 0.333        | 0.384               | 0.836        |
|                                             | CV   | 0.515        | 0.895        | 0.281               | 0.749        |
| Total-double-support-phase percent          | mean | 0.595        | 0.403        | 0.366               | 0.824        |
|                                             | CV   | 0.460        | 0.725        | 0.229               | 0.691        |

<sup>1</sup>Items in **bold** are significant.



**Supplementary Table 6.** For distinguishing FOGConv from noFOG based on progression rates<sup>1</sup>, cutoff points<sup>2</sup> that optimize the Youden's index are provided.

|                              |      | FOGConv pre-conversion<br>observations (n=9) |                 | FOGConv all<br>observations (n=10) |                 |
|------------------------------|------|----------------------------------------------|-----------------|------------------------------------|-----------------|
|                              |      | Youden's<br>Index                            | Cutoff<br>point | Youden's<br>Index                  | Cutoff<br>point |
| Integrated-pressure          | mean | 0.398                                        | 0.074           | 0.250                              | 0.042           |
|                              | CV   | 0.301                                        | -0.121          | 0.086                              | 0.042           |
| Foot-strike-length (cm)      | mean | 0.399                                        | -0.013          | 0.210                              | -0.013          |
|                              | CV   | 0.434                                        | 0.105           | 0.484                              | 0.085           |
| Stride-length (cm)           | mean | 0.614                                        | -0.040          | 0.602                              | -0.036          |
|                              | CV   | 0.354                                        | 0.153           | 0.401                              | 0.117           |
| Stride-width (cm)            | mean | 0.431                                        | 0.082           | 0.449                              | 0.062           |
|                              | CV   | 0.488                                        | -0.185          | 0.366                              | -0.012          |
| Stride-time (s)              | mean | 0.225                                        | 0.016           | 0.233                              | 0.015           |
|                              | CV   | 0.360                                        | -0.181          | 0.433                              | 0.108           |
| Stride-velocity (cm/s)       | mean | 0.530                                        | -0.051          | 0.551                              | -0.046          |
|                              | CV   | 0.402                                        | 0.141           | 0.428                              | 0.084           |
| Swing-phase %                | mean | 0.625                                        | -0.022          | 0.569                              | -0.019          |
|                              | CV   | 0.624                                        | 0.188           | 0.692                              | 0.142           |
| Total-double-support-phase % | mean | 0.588                                        | 0.045           | 0.517                              | 0.043           |
|                              | CV   | 0.411                                        | 0.127           | 0.464                              | 0.101           |

<sup>1</sup> The progression rate is the linear slope of the log<sub>2</sub>-transformed spatiotemporal gait parameter over time for a single patient. <sup>2</sup> Cutoff points were estimated with the kernel smoothing method recommended in Fluss et al. (2005).

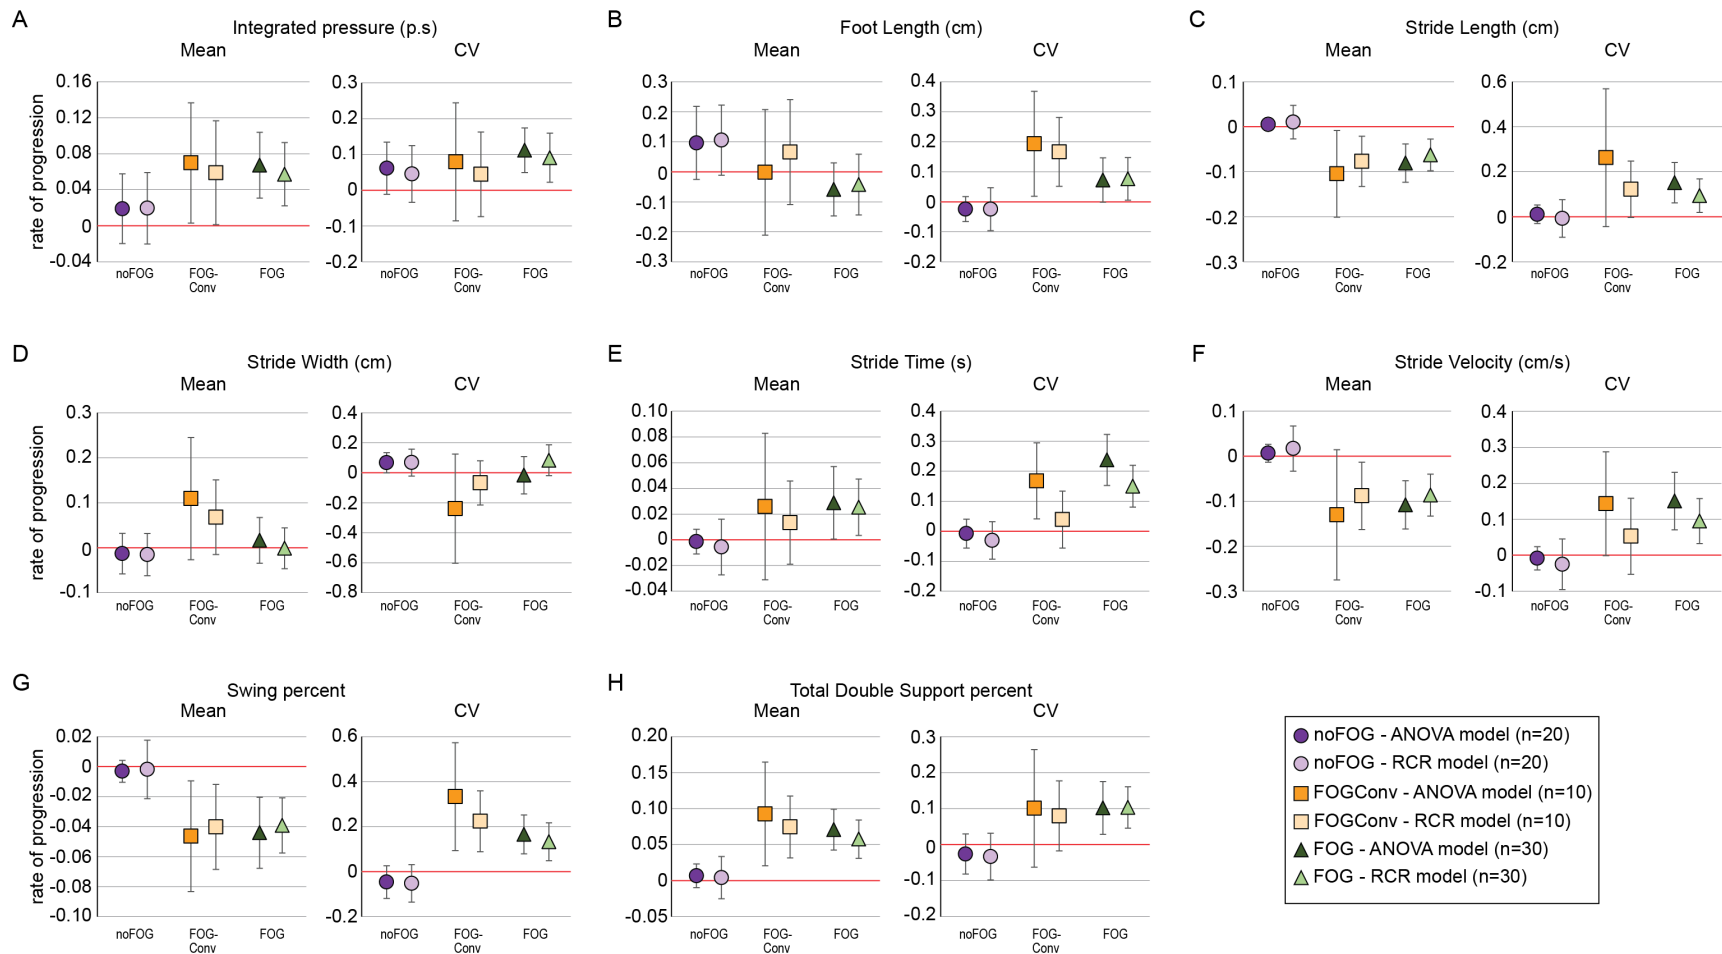

**Supplementary Figure 1.** Comparison of ANOVA and RCR models. A-H) The rate of progression (slope) in the log<sub>2</sub>-transformed mean (left panels) and coefficient of variability (CV, right panels) are shown for 8 spatiotemporal gait parameters for both the ANOVA (dark colored symbols) and RCR models (light colored symbols). Values are plotted as means with 95% confidence intervals. Groups with confidence intervals not crossing 0 are significantly declining over time. Estimates from the ANOVA model are similar to those from the most complicated RCR model.
